# Supplementary material for: Emulsions stabilised with pectin-based microgels: investigations into the effect of pH and ionic strength on emulsion stability
Source: Royal Society of Chemistry journal article supplement (doi:10.1039/d1fo00891a), 2021-01-01
Supplement: d1fo00891a1.pdf [file d1fo00891a1.pdf]

## 1 Supplementary material

S1

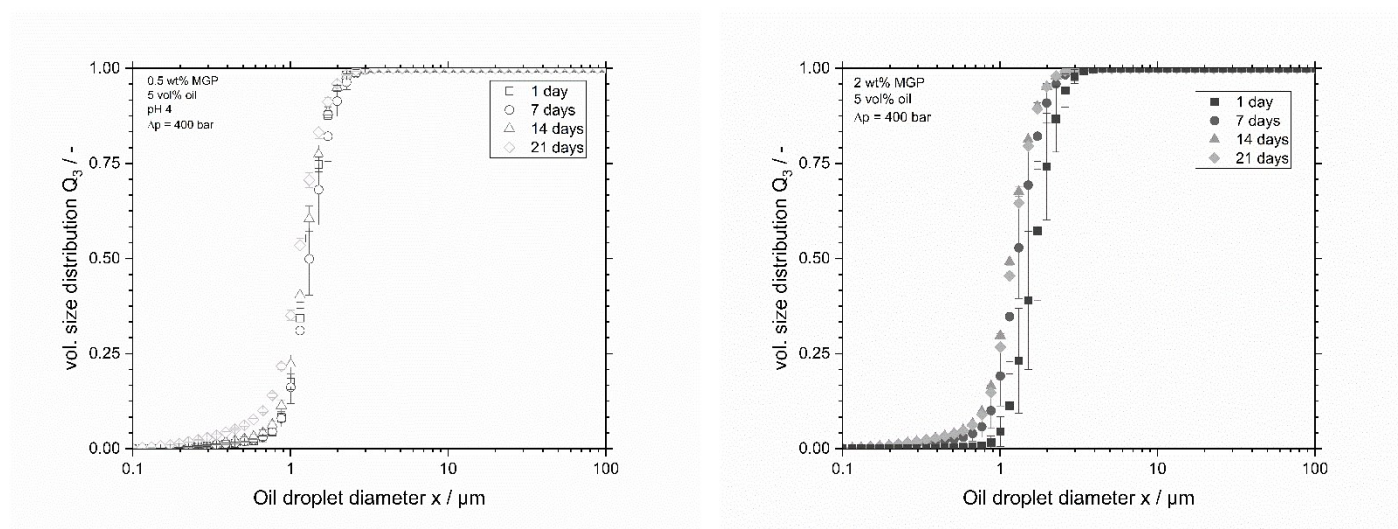

Figure S1: Volumetric droplet size distribution of o/w emulsions (5 vol% MCT oil in water, pH 4), stabilised with amidated pectin microgel particles. Emulsions were prepared with a HPH at  $\Delta p = 400$  bar and were measured 1; 7; 14, and 21 days after emulsification. Left: 0.5 wt% MGP. Right: 2 wt% MGP

S2

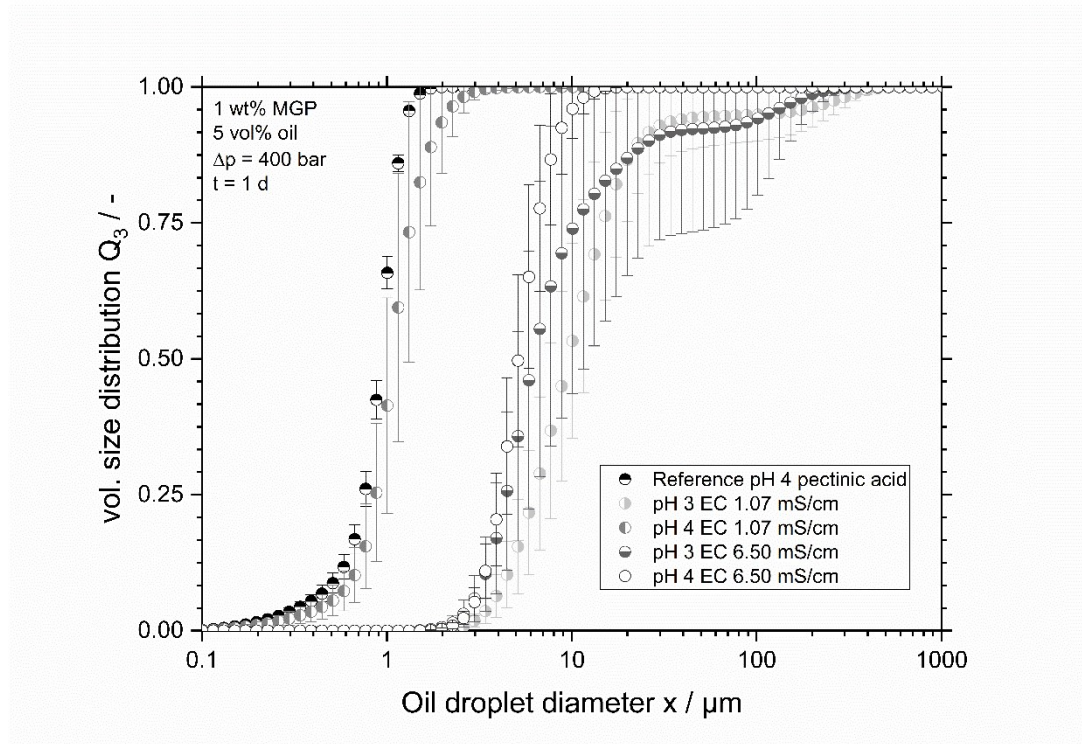

Figure S2: Volumetric droplet size distribution of o/w emulsions (5 vol% MCT oil in water, pH 4 and pH 3), stabilised with 1 wt% pectinic acid microgel particles. Molecular features of pectinic acid: degree of methyl-esterification of

2%, protein content of 3.1%, and molecular weight of 34 kDa. Emulsions were prepared with a HPH at = 400 bar and were measured 1 days after emulsification.
